# Supplementary material for: Filamentous fungal biofilms: Conserved and unique aspects of extracellular matrix composition, mechanisms of drug resistance and regulatory networks in Aspergillus fumigatus
Source: PubMed Central journal article supplement (PMC9581972; doi:10.1038/s41522-022-00347-3), 2022-10-19
Supplement: 41522_2022_347_MOESM1_ESM.pdf [file 41522_2022_347_MOESM1_ESM.pdf]

Supplementary Table 1 The *A. fumigatus* orthologs of *C. albicans* biofilms formation transcriptional regulators

| Biofilm regulators in <i>C.albicans</i> | Orthologs in <i>A. fumigatus</i> | Function in <i>A. fumigatus</i>                                                                                                          | Identities | References |
|-----------------------------------------|----------------------------------|------------------------------------------------------------------------------------------------------------------------------------------|------------|------------|
| <b><i>flo8</i></b>                      | Afu7g02260 ( <i>somA</i> )       | Regulator of adherence, biofilm formation, development, virulence and cell wall homeostasis                                              | 23%        | 1-3        |
| <b><i>efg1</i></b>                      | Afu2g07900 ( <i>stuA</i> )       | APSES domain transcription factor involved in regulation of conidiophore development, biofilm formation and secondary metabolism         | 73%        | 2,4-6      |
| <b><i>bcr1</i></b>                      | Afu3g09820 ( <i>dvrA</i> )       | Regulator of virulence and host cell interactions                                                                                        | 71%        | 7          |
| <b><i>brg1</i></b>                      | Afu3g13870 ( <i>nsdD</i> )       | Regulator of asexual development, mating and putative regulator of cell wall synthesis                                                   | 68%        | 8-10       |
| <b><i>tec1</i></b>                      | Afu1g04830 ( <i>abaA</i> )       | Transcriptional activator involved in regulation of conidiation, cell death, autolysis and biogenesis of gliotoxin                       | 48%        | 11,12      |
| <b><i>leu3</i></b>                      | Afu2g03460 ( <i>leuB</i> )       | The Zn <sub>2</sub> Cys <sub>6</sub> -type transcription factor LeuB cross-links regulation of leucine biosynthesis and iron acquisition | 43%        | 13         |
| <b><i>tup1</i></b>                      | Afu6g05150 ( <i>rocA</i> )       | Transcriptional repressor                                                                                                                | 59%        | 14         |
| <b><i>zap1</i></b>                      | Afu1g10080 ( <i>zafA</i> )       | The zinc-responsive transcription factor that controls the adaptive response to zinc starvation and virulence                            | 39%        | 15,16      |
| <b><i>cas5</i></b>                      | Afu1g16590 ( <i>brlA</i> )       | A key activator for developmental initiation and transcription factor of response to nitrogen depletion                                  | 48%        | 6,17,18    |
| <b><i>rim101</i></b>                    | Afu3g11970 ( <i>pacC</i> )       | The pH-responsive PacC transcription factor governs epithelial entry and tissue invasion during pulmonary aspergillosis                  | 67%        | 19,20      |

|                     |                            |                                                                                                                          |     |       |
|---------------------|----------------------------|--------------------------------------------------------------------------------------------------------------------------|-----|-------|
| <b><i>bpr1</i></b>  | Afu1g03210 ( <i>flbD</i> ) | Transcription activator governs conidium formation and development                                                       | 61% | 17    |
| <b><i>ada2</i></b>  | Afu2g10640 ( <i>adaB</i> ) | A subunit of the SAGA complex, involved in regulation of conidiophore development, biofilm formation and drug resistance | 43% | 21,22 |
| <b><i>ace2</i></b>  | Afu3g11250 ( <i>ace2</i> ) | Transcription factor governs pigment production, conidiation and virulence                                               | 45% | 23    |
| <b><i>gcn4</i></b>  | Afu4g12470 ( <i>cpcA</i> ) | Regulator of amino acid biosynthesis and virulence                                                                       | 39% | 24,25 |
| <b><i>fcr3</i></b>  | Afu2g02540 ( <i>rmsA</i> ) | Transcription factor governs gliotoxin cluster metabolites                                                               | 28% | 26    |
| <b><i>gzf3</i></b>  | Afu2g13380 ( <i>areB</i> ) | Regulator involved in nitrogen and carbon metabolism in <i>Aspergillus nidulans</i>                                      | 89% | 27,28 |
| <b><i>snf5</i></b>  | Afu2g16840                 | Unknown function                                                                                                         | 32% | —     |
| <b><i>try2</i></b>  | Afu3g02380                 | Unknown function                                                                                                         | 42% | —     |
| <b><i>sfp1</i></b>  | Afu1g14750                 | Unknown function                                                                                                         | 66% | —     |
| <b><i>taf14</i></b> | Afu5g12190                 | Unknown function                                                                                                         | 38% | —     |
| <b><i>war1</i></b>  | Afu7g01640                 | Unknown function                                                                                                         | 45% | —     |
| <b><i>try5</i></b>  | Afu2g16230                 | Unknown function                                                                                                         | 73% | —     |
| <b><i>gal4</i></b>  | Afu3g06740                 | Unknown function                                                                                                         | 38% | —     |
| <b><i>suc1</i></b>  | Afu1g17150                 | Unknown function                                                                                                         | 28% | —     |
| <b><i>rfg1</i></b>  | Afu4g10820                 | Unknown function                                                                                                         | 49% | —     |
| <b><i>zcf28</i></b> | Afu1g01650                 | Unknown function                                                                                                         | 38% | —     |
| <b><i>zcf32</i></b> | Afu1g01850                 | Unknown function                                                                                                         | 56% | —     |
| <b><i>zcf34</i></b> | Afu5g01700                 | Unknown function                                                                                                         | 37% | —     |
| <b><i>ahr1</i></b>  | Afu5g11070                 | Unknown function                                                                                                         | 35% | —     |
| <b><i>dal81</i></b> | Afu3g08050                 | Unknown function                                                                                                         | 32% | —     |

|                     |            |                  |     |   |
|---------------------|------------|------------------|-----|---|
| <b><i>fgr27</i></b> | Afu8g04540 | Unknown function | 29% | — |
| <b><i>ndt80</i></b> | ND         | —                | —   | — |
| <b><i>rob1</i></b>  | ND         | —                | —   | — |
| <b><i>rfx2</i></b>  | ND         | —                | —   | — |
| <b><i>nrg1</i></b>  | ND         | —                | —   | — |
| <b><i>try4</i></b>  | ND         | —                | —   | — |
| <b><i>try6</i></b>  | ND         | —                | —   | — |
| <b><i>als1</i></b>  | ND         | —                | —   | — |
| <b><i>als2</i></b>  | ND         | —                | —   | — |
| <b><i>als3</i></b>  | ND         | —                | —   | — |
| <b><i>hwp1</i></b>  | ND         | —                | —   | — |
| <b><i>ugm6</i></b>  | ND         | —                | —   | — |
| <b><i>tye7</i></b>  | ND         | —                | —   | — |
| <b><i>mss11</i></b> | ND         | —                | —   | — |
| <b><i>czf1</i></b>  | ND         | —                | —   | — |
| <b><i>try3</i></b>  | ND         | —                | —   | — |
| <b><i>uga33</i></b> | ND         | —                | —   | — |
| <b><i>zcf31</i></b> | ND         | —                | —   | — |
| <b><i>zcf39</i></b> | ND         | —                | —   | — |
| <b><i>zfu2</i></b>  | ND         | —                | —   | — |
| <b><i>znc1</i></b>  | ND         | —                | —   | — |
| <b><i>meT4</i></b>  | ND         | —                | —   | — |
| <b><i>not3</i></b>  | ND         | —                | —   | — |
| <b><i>sap6</i></b>  | ND         | —                | —   | — |

To detect the orthologs, a method called reciprocal Best Hits (RBH) was used. Orthologs are assumed if two genes each in a different genome find each other as the best hit in the other genome<sup>29</sup>.

The descriptions of the orthologs in *A. fumigatus* are based on FungiDB database (<http://fungidb.org/fungidb/>) release 56, 15 Feb 2022 and NCBI-Pubmed (<https://www.ncbi.nlm.nih.gov>).

## References

1. Lin, C.J., *et al.* Transcription factor SomA is required for adhesion, development and virulence of the human pathogen *Aspergillus fumigatus*. *PLoS Pathog* **11**, e1005205 (2015).
2. Zhang, S., *et al.* PtaB, a lim-domain binding protein in *Aspergillus fumigatus* regulates biofilm formation and conidiation through distinct pathways. *Cell Microbiol* **20**, e12799 (2018).
3. Chen, Y., *et al.* The transcription factor SomA synchronously regulates biofilm formation and cell wall homeostasis in *Aspergillus fumigatus*. *mBio* **11**, e02329-02320 (2020).
4. Gravelat, F.N., *et al.* *Aspergillus galactosaminogalactan* mediates adherence to host constituents and conceals hyphal beta-glucan from the immune system. *PLoS Pathog* **9**, e1003575 (2013).
5. Sheppard, D.C., *et al.* The *Aspergillus fumigatus* StuA protein governs the up-regulation of a discrete transcriptional program during the acquisition of developmental competence. *Mol Biol Cell* **16**, 5866-5879 (2005).
6. Twumasi-Boateng, K., *et al.* Transcriptional profiling identifies a role for BrlA in the response to nitrogen depletion and for StuA in the regulation of secondary metabolite clusters in *Aspergillus fumigatus*. *Eukaryot Cell* **8**, 104-115 (2009).
7. Ejzykiewicz, D.E., *et al.* Role of *Aspergillus fumigatus* DvrA in host cell interactions and virulence. *Eukaryot Cell* **9**, 1432-1440 (2010).
8. Lee, M.-K., *et al.* NsdD is a key repressor of asexual development in *Aspergillus nidulans*. *Genetics* **197**, 159-173 (2014).
9. Szweczyk, E. & Krappmann, S. Conserved regulators of mating are essential for *Aspergillus fumigatus* cleistothecium formation. *Eukaryot Cell* **9**, 774-783 (2010).
10. Lee, M.K., *et al.* Negative regulation and developmental competence in *Aspergillus*. *Sci Rep* **6**, 28874 (2016).
11. Tao, L. & Yu, J.H. AbaA and WetA govern distinct stages of *Aspergillus fumigatus* development. *Microbiology* **157**, 313-326 (2011).
12. Shin, K.S., Kim, Y.H. & Yu, J.H. Proteomic analyses reveal the key roles of BrlA and AbaA in biogenesis of gliotoxin in *Aspergillus fumigatus*. *Biochem Biophys*

- Res Commun* **463**, 428-433 (2015).
13. Long, N., *et al.* The Zn<sup>2</sup>Cys<sup>6</sup>-type transcription factor LeuB cross-links regulation of leucine biosynthesis and iron acquisition in *Aspergillus fumigatus*. *PLoS Genet* **14**, e1007762 (2018).
  14. Johnk, B., *et al.* SCF ubiquitin ligase F-box protein Fbx15 controls nuclear co-repressor localization, stress response and virulence of the human pathogen *Aspergillus fumigatus*. *PLoS Pathog* **12**, e1005899 (2016).
  15. Vicentefranqueira, R., *et al.* The transcription factor ZafA regulates the homeostatic and adaptive response to zinc starvation in *Aspergillus fumigatus*. *Genes (Basel)* **9**, 318 (2018).
  16. Moreno, M.Á., *et al.* The regulation of zinc homeostasis by the ZafA transcriptional activator is essential for *Aspergillus fumigatus* virulence. *Mol Microbiol* **64**, 1182-1197 (2007).
  17. Park, H.S. & Yu, J.H. Developmental regulators in *Aspergillus fumigatus*. *J Microbiol* **54**, 223-231 (2016).
  18. Mah, J.H. & Yu, J.H. Upstream and downstream regulation of asexual development in *Aspergillus fumigatus*. *Eukaryot Cell* **5**, 1585-1595 (2006).
  19. Bignell, E., *et al.* The *Aspergillus* pH-responsive transcription factor PacC regulates virulence. *Mol Microbiol* **55**, 1072-1084 (2005).
  20. Staff, P.P. Correction: The pH-responsive PacC transcription factor of *Aspergillus fumigatus* governs epithelial entry and tissue invasion during pulmonary aspergillosis. *PLoS Pathog* **11**, e1004802 (2015).
  21. Chen, Y., *et al.* Spt20, a structural subunit of the SAGA complex, regulates *Aspergillus fumigatus* biofilm formation, asexual development, and virulence. *Appl Environ Microbiol* **88**, e0153521 (2022).
  22. Furukawa, T., *et al.* The negative cofactor 2 complex is a key regulator of drug resistance in *Aspergillus fumigatus*. *Nat Commun* **11**, 427 (2020).
  23. Ejzykowicz, D.E., *et al.* The *Aspergillus fumigatus* transcription factor Ace2 governs pigment production, conidiation and virulence. *Mol Microbiol* **72**, 155-169 (2009).
  24. Krappmann, S., *et al.* The *Aspergillus fumigatus* transcriptional activator CpcA contributes significantly to the virulence of this fungal pathogen. *Mol Microbiol* **52**, 785-799 (2004).
  25. Lee, I.R., Morrow, C.A. & Fraser, J.A. Nitrogen regulation of virulence in clinically prevalent fungal pathogens. *FEMS Microbiol Lett* **345**, 77-84 (2013).
  26. Sekonyela, R., *et al.* RsmA regulates *Aspergillus fumigatus* gliotoxin cluster metabolites including cyclo(L-Phe-L-Ser), a potential new diagnostic marker for invasive aspergillosis. *PLoS One* **8**, e62591 (2013).
  27. Macios, M., Caddick, M.X., Weglenski, P., Scazzocchio, C. & Dzikowska, A. The GATA factors AREA and AREB together with the co-repressor NMRA, negatively regulate arginine catabolism in *Aspergillus nidulans* in response to nitrogen and carbon source. *Fungal Genet Biol* **49**, 189-198 (2012).

28. Chudzicka-Ormaniec, P., *et al.* The role of the GATA transcription factor AreB in regulation of nitrogen and carbon metabolism in *Aspergillus nidulans*. *FEMS Microbiol Lett* **366** (2019).
29. Moreno-Hagelsieb, G. & Latimer, K. Choosing BLAST options for better detection of orthologs as reciprocal best hits. *Bioinformatics* **24**, 319-324 (2008).
